# Supplementary material
Source: PubMed Central journal article supplement (PMC3204033)

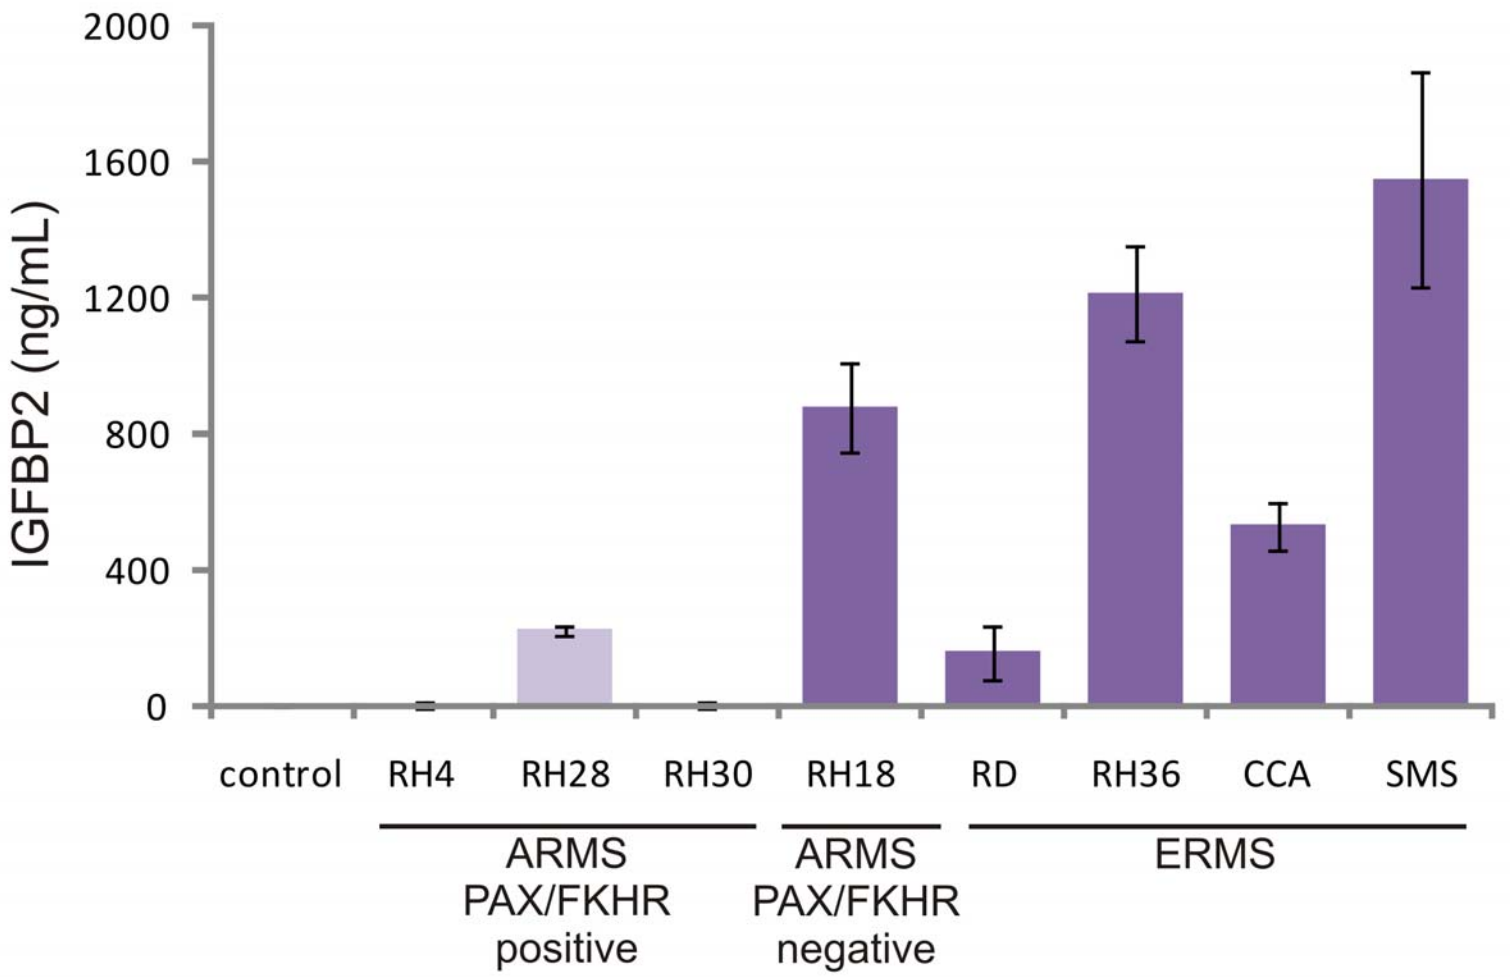

Supplement: mmc1.pdf [file mmc1.pdf]

GM130 (Golgi)

VSVG-GFP

co-localized region

C2C12

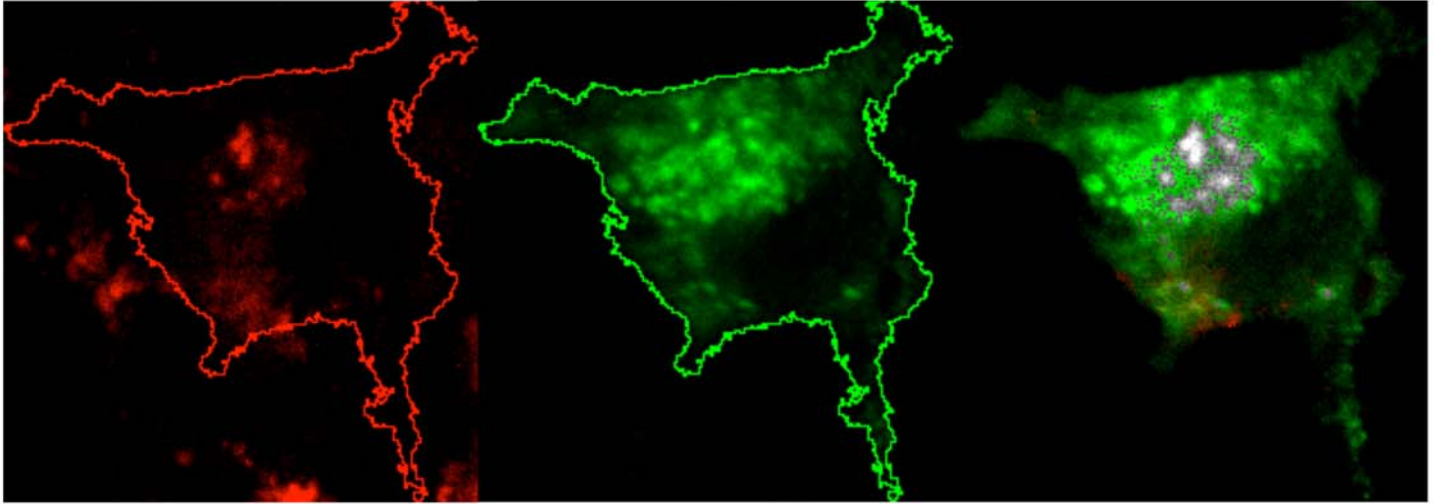

RH30

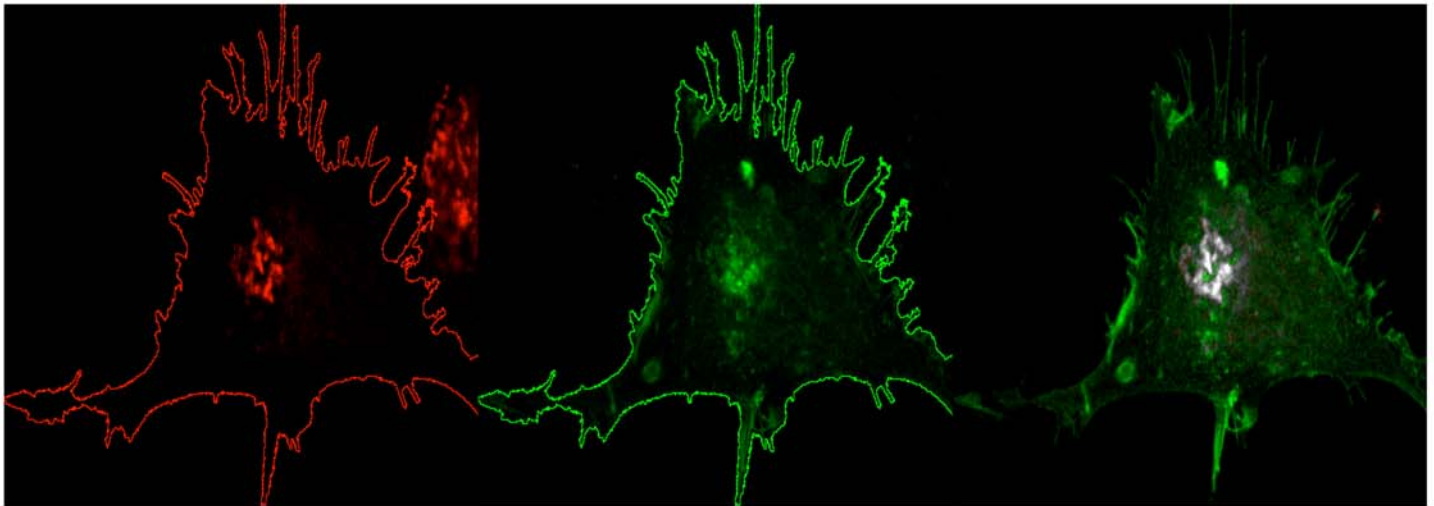

RH36

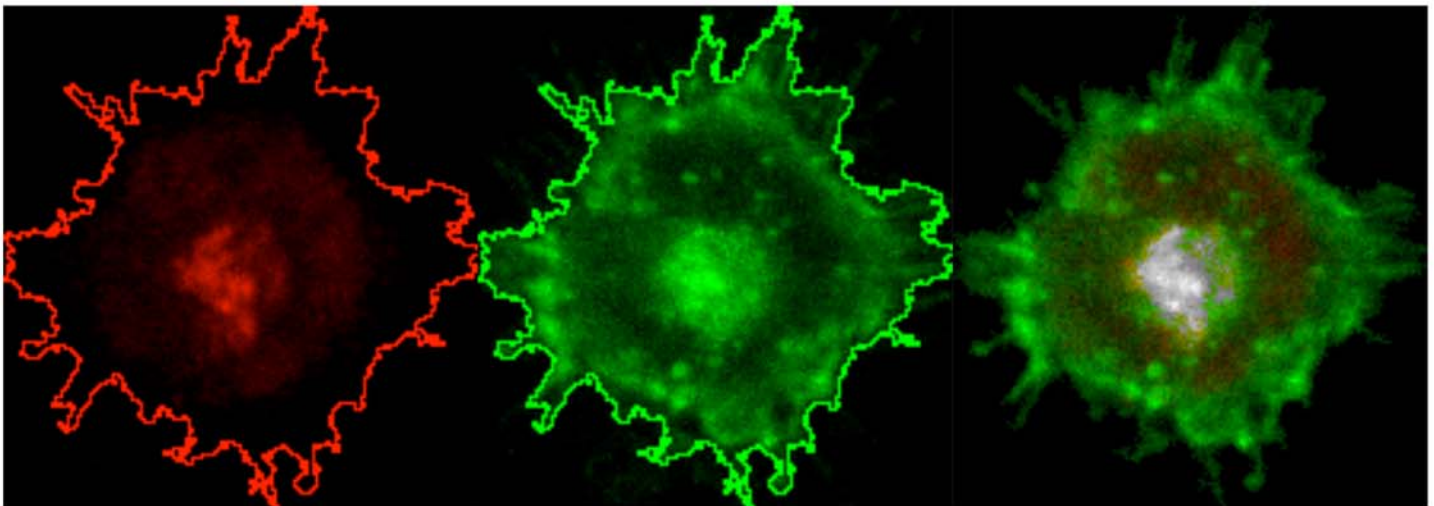

Supplement: mmc2.pdf [file mmc2.pdf]

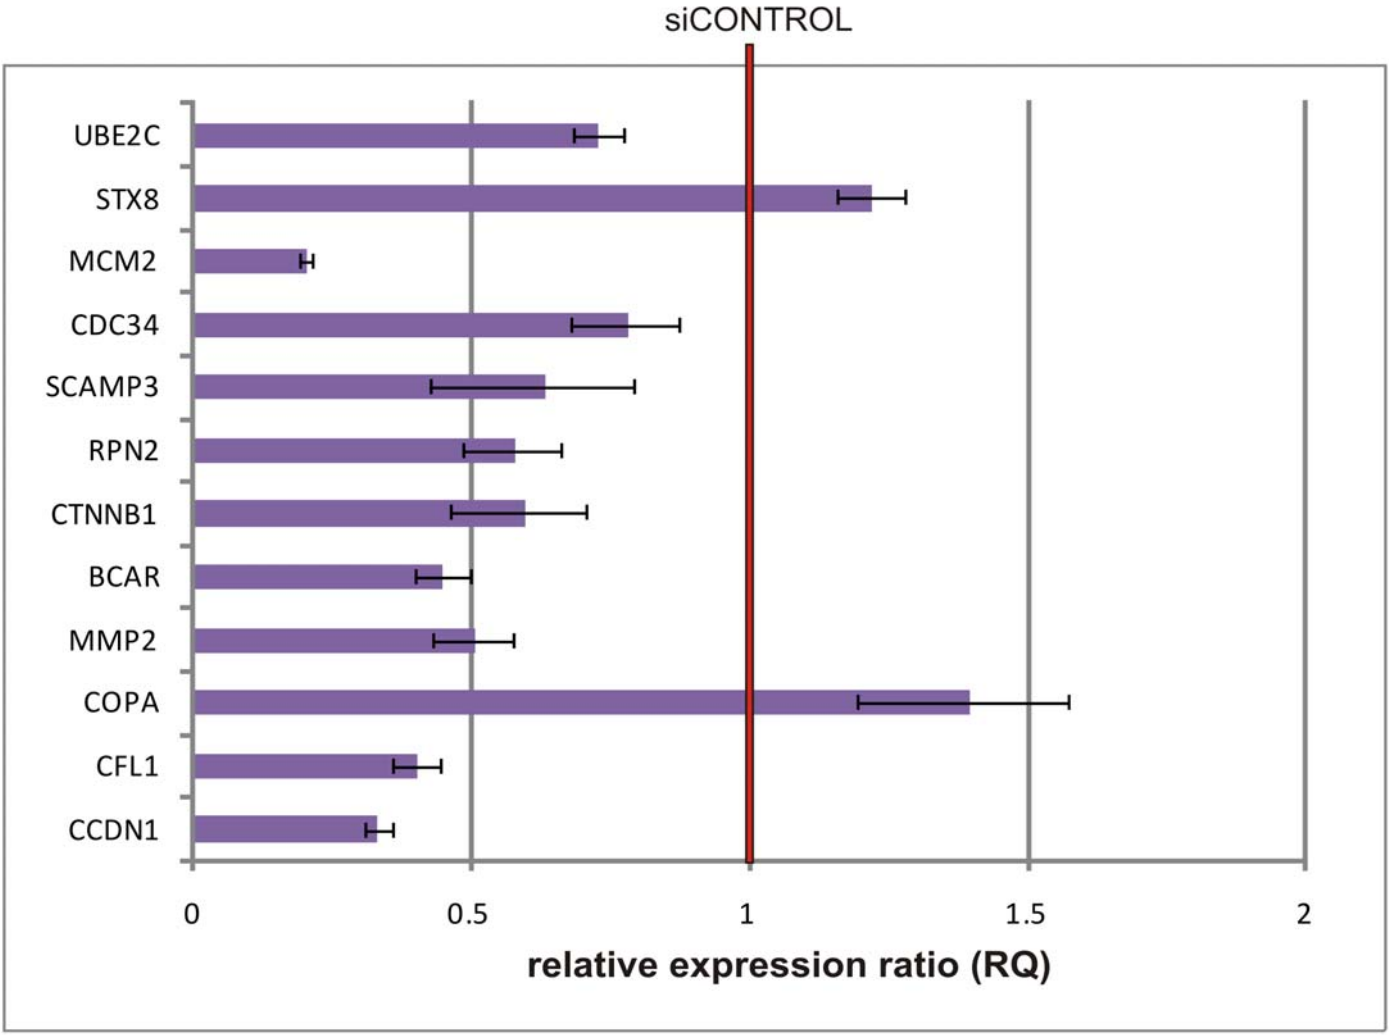

Supplement: mmc3.pdf [file mmc3.pdf]

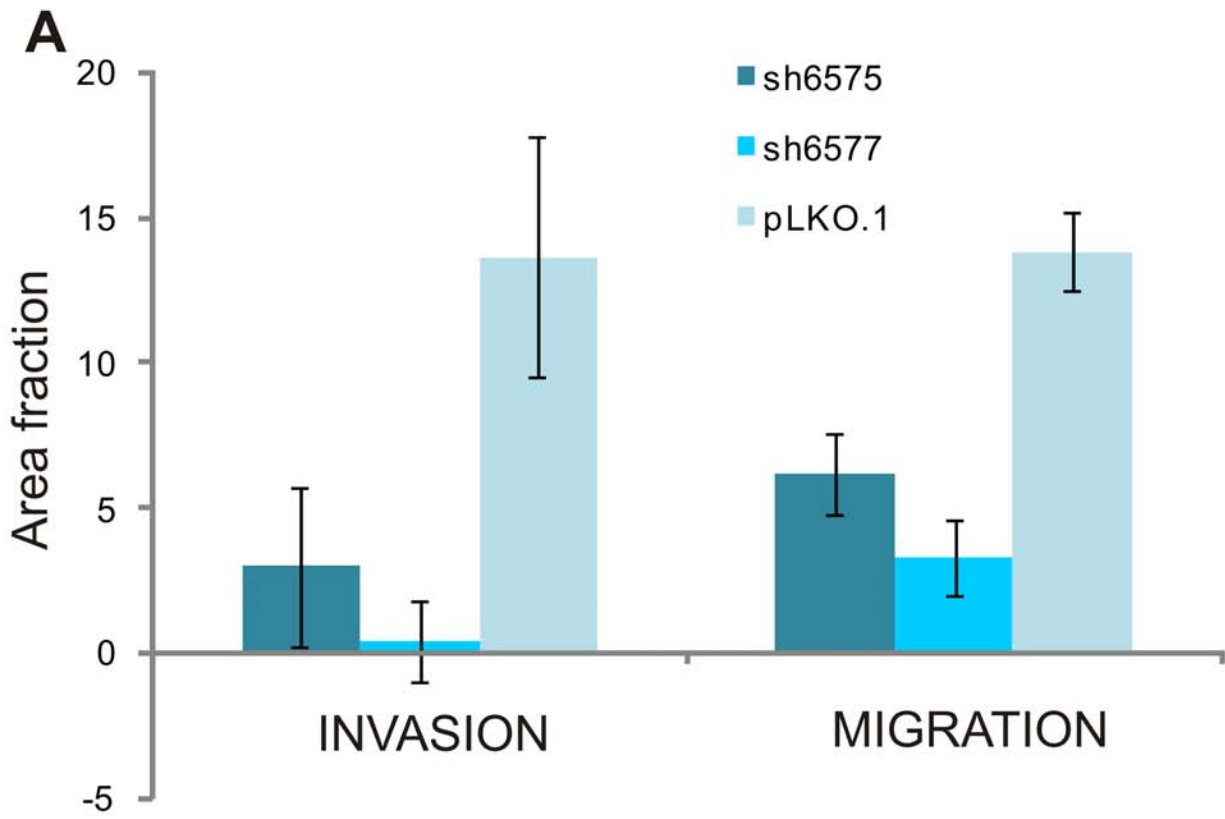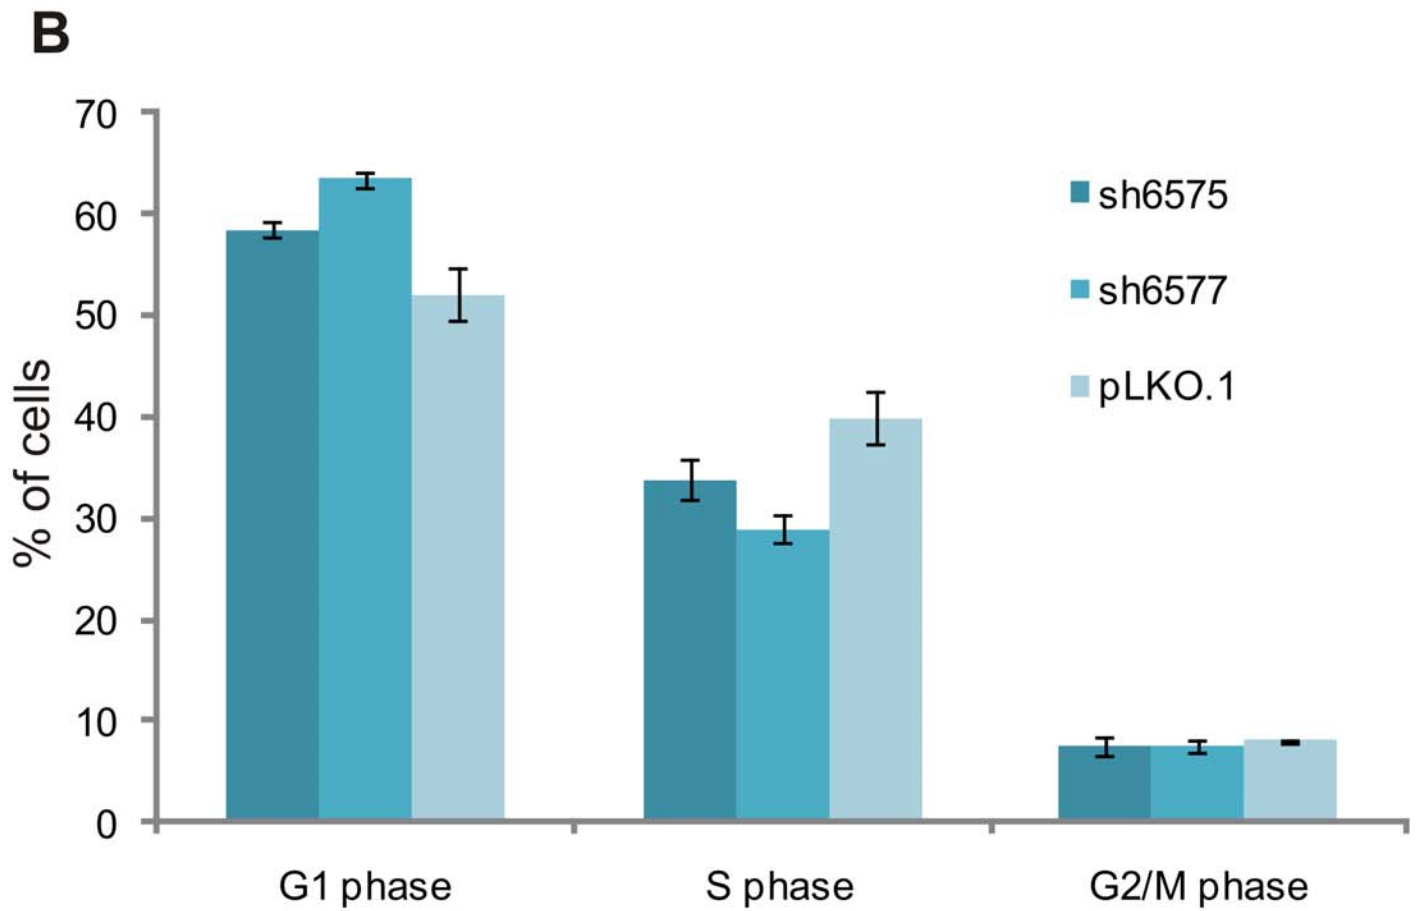

Supplement: mmc4.pdf [file mmc4.pdf]
